# Supplementary material
Source: PubMed Central journal article supplement (PMC3340444)
Supplement: NIHMS364683-supplement-01.pdf [file NIHMS364683-supplement-01.pdf]

A.

```

nrdA (1) MNQNLVTHRDGSTERINLAKIHRVLDWAAEGLHN--VSISQVELRSHIQFDGKIKTSDIHETII
Human (1) ----MHVYHRDGRQERVVFDKITSRIQKLCYGLNMFVDPAQITMKVIQGLYSGVTTVELDTLAA
S. pombe (1) ----MFVYHRDGRQEKVAFDKITARVSRLCYGLSDHVDPVEITQKVI SGVYPGVTTVELDNLAA
R1R2mouse (1) ----MHVYHRDGRQERVVFDKITSRIQKLCYGLNMFVDPAQITMKVIQGLYSGVTTVELDTLAA
Vaccinia virus (1) ----MFVYHRNGYKENVMFDKITSRIQKLCYGLNTHLDPKIKIAMKVIQGLYSGVTTVELDTLAA
Phage T4 (1) -MQLINVTSSGVSQSFDPQKLIKVLSWAAEGTSV---DPYELIYENIKSYLRDCMTDDIQTIVI

nrdA (64) KAAADLIERDAPDYQYLAARLAIFHRRKKAYGQFEPPALYDQVVKMVEMKYD---NHLEEDYTE
Human (62) ETAATLTT-KHPDYAILAARIAVSNLHKETKKVFSQVMEDLNYINPHNGKHSFVAKSTLDIVL
S. pombe (62) ETAATMTT-KHPDYAILAARIAVSNLHKQTEKVFSQVWQQLDYVNPKTDKPAFPMISDKIYDIVM
R1R2mouse (62) ETAATLTT-KHPDYAILAARIAVSNLHKETKKVFSQVMEDLNYINPHNGRHSFVASTLDIVM
Vaccinia virus (62) EIAATCTT-QHPDYAILAARIAVSNLHKETKLFSEVMEDLFNYVNPKNKNGKHSFIISSTIMDIVN
Phage T4 (62) KAAANSISVEE PDYQYVAARCLMFAIRKHKVYGGYEPRSFIDHISYCVNAGKYDF---ELLSKYSA

nrdA (126) EEFKQMDTFIDHRRDMFTSYAAVKQLEGKYLQNRVIGETIYSAQFYILVAACLFSNYPRETRL
Human (126) ANKDRLNSAIIYDRDFSYNYFGFKTLERSYLLK--INGKVAERPQHMLMRVSVGIHK-----EDI
S. pombe (126) KHKDELDSAIYDRDFTYNYFGFKTLERSYLLR--IDGKVAERPQHMI MRVAVGIHG-----EDI
R1R2mouse (126) ANKDRLNSAIIYDRDFSYNYFGFKTLERSYLLK--INGKVAERPQHMLMRVSVGIHK-----EDI
Vaccinia virus (126) KYKDKLNSVIIYDRDFSYNYFGFKTLERSYLLK--INNKIVERPQHMLMRVAVGIHQ-----WDI
Phage T4 (124) EEIFTLESKIKHERDMETYSGAMQLEKELYVKDKTTGQIYETPQFAFNTIGMALHQDEP-VDRR

nrdA (191) QYVKRFYDAVSTFKISLPTFIMSGVRTPTRQFSSCVLIECG-DSLDSINATSSAIVKYVSQRAGI
Human (184) DAAIETYNLLSERWFTHASPTLFNAGTNRPOLSSCFLLSMKDDSI EGIYDTLRCALISKSAGGI
S. pombe (184) EAAIETYNIMSQRWFTHASPTLFNAGTNRPOLSSCFIVTMKDDSI EGIYDTLRCAMISKTAGGI
R1R2mouse (184) DAAIETYNLLSEKWFTHASPTLFNAGTNRPOLSSCFLLSMKDDSI EGIYDTLRCALISKSAGGI
Vaccinia virus (184) DSAIETYNLLSEKWFTHASPTLFNAGTNRHQMSSCFLLNMI DSI EGIYDTLRCALISKMAGGI
Phage T4 (188) KHVIRFYEAVSTRQISLPTFIMAGCRTPTRQFSSCVVIEAG-DSLKSINKASASIVEYISKRAGI

nrdA (255) GINAGRIRALGSPTRGGEFHTGCEFFYKHFQTAVKSCSQGG-VRGAAATLFYPMWHLEVESLIV
Human (249) GVAVSCIRATGSYIAGTNGNSNGLVEMLRVYNNNTARYVDQGGNKRPGAFAYILEPWHLDIFEFLLD
S. pombe (249) GINAHNIRATGSYIAGTNGTNSNGIVEMLRVYNNNTARYVDQGGNKRPGAFAYILEPWHADVMDFFLE
R1R2mouse (249) GVAVSCIRATGSYIAGTNGNSNGLVEMLRVYNNNTARYVDQGGNKRPGAFAYILEPWHLDIFEFLLD
Vaccinia virus (249) GLSISNIRASGSYISGTNGISNGIIEMLRVYNNNTARYVDQGGNKRPGAFAYILEPWHSDIMATLD
Phage T4 (252) GINVGMI RAE GSKIGMGEVRHTGVIEFWKHFQTAVKSCSQGG-IRGAAATAYYPIWHLEVENLIV

```

B.

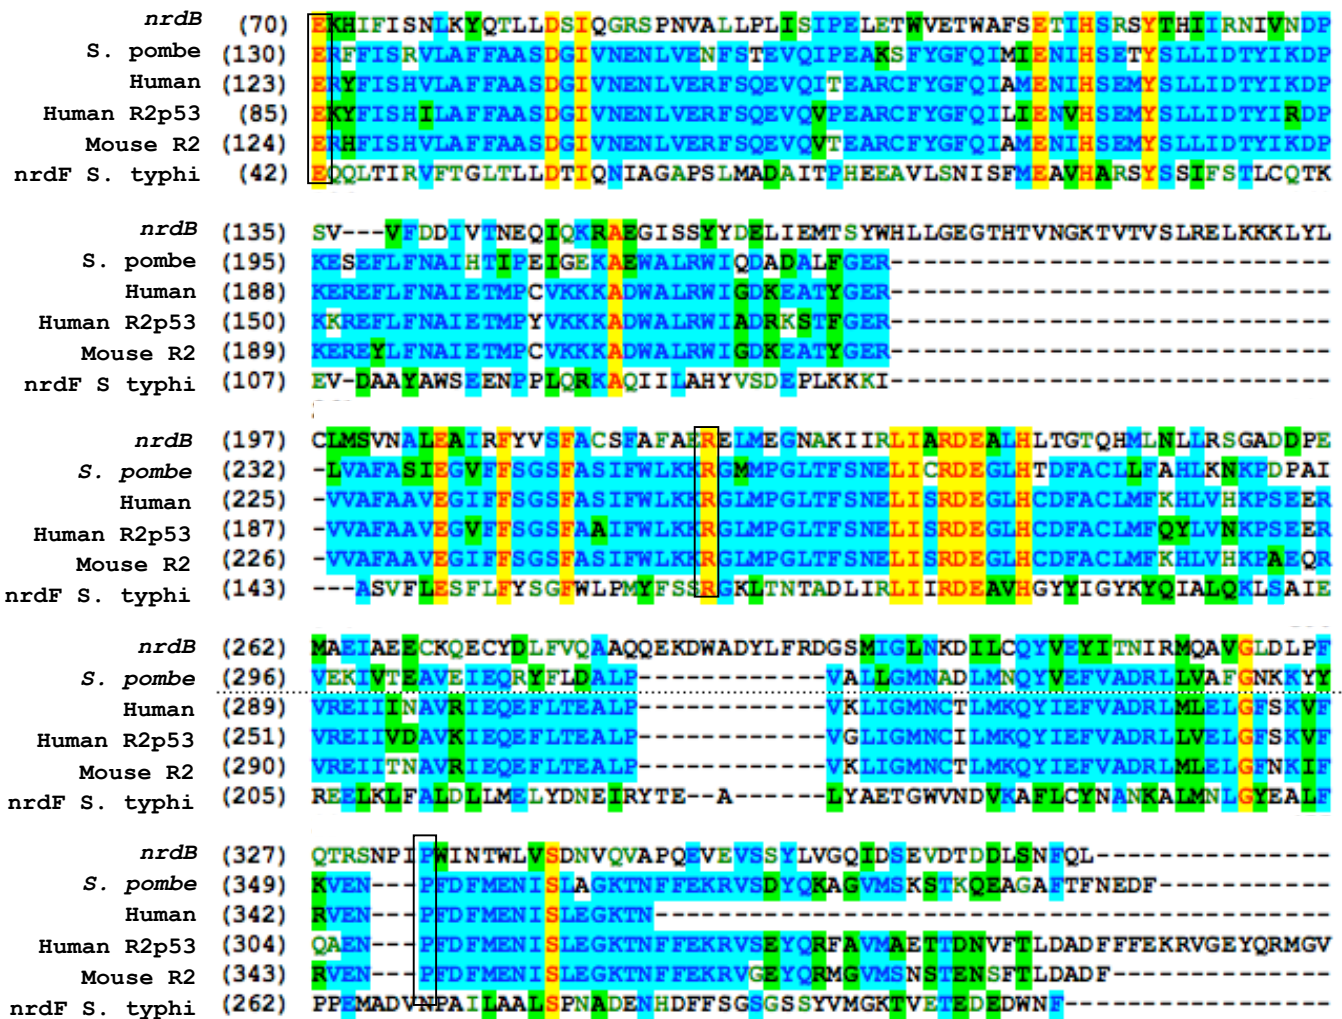

**Figure S1. Alignment of RNR R1 (A) and R2 (B) sequences from different species.** Different colors indicate different degrees of conservation. Rectangles indicate the residues that were found to yield mutator phenotype when altered. Sequences were obtained from GenBank (NCBI) and alignments were generated using the program VectorNTI (Invitrogen). *nrdA* and *nrdB* represent the *E. coli* ribonucleotide reductase gene.
